# Supplementary material for: Serotonin receptor type 1B constitutes a therapeutic target for MDS and CMML
Source: PubMed Central journal article supplement (PMC6141614; doi:10.1038/s41598-018-32306-4), 2018-09-17

## **Serotonin receptor type 1B constitutes a therapeutic target for MDS and CMML.**

Antònia Banús-Mulet<sup>1,2</sup>, Amaia Etxabe<sup>1,2</sup>, Josep Maria Cornet-Masana<sup>1,3,4</sup>, Miguel Ángel Torrente<sup>1,4,5</sup>, María Carmen Lara-Castillo<sup>1,6</sup>, Laura Palomo<sup>1</sup>, Meritxell Nomdedeu<sup>1,5</sup>, Marina Díaz-Beyá<sup>1,4,5,7</sup>, Francesc Solé<sup>1</sup>, Benet Nomdedeu<sup>4,5</sup>, Jordi Esteve<sup>1,4,5,7</sup>, Ruth M. Risueño<sup>1\*</sup>

<sup>1</sup>Josep Carreras Leukaemia Research Institute (IJC). Barcelona, Spain.

<sup>2</sup>Faculty of Pharmacy. University of Barcelona, Spain.

<sup>3</sup>Institut d'Investigació en Ciències de la Salut Germans Trias i Pujol (IGTP). Badalona, Spain.

<sup>4</sup>Faculty of Medicine. University of Barcelona, Spain.

<sup>5</sup>Department of Hematology. Hospital Clínic. Barcelona, Spain.

<sup>6</sup>Leukos Biotech. Barcelona, Spain.

<sup>7</sup>Institut d'Investigacions Biomèdiques August Pi i Sunyer (IDIBAPS). Barcelona, Spain.

RUNNING TITLE: HTR in MDS and CMML

\* Corresponding author:

Ruth M. Risueño

Josep Carreras Leukaemia Research Institute

Campus Clínic-UB

Carrer del Rosselló, 149-153

08036 – Barcelona (Spain)

Telf: +34 93 227 5400 ext.4528

e-mail: [risueno@carrerasresearch.org](mailto:risueno@carrerasresearch.org)

1 **SUPPLEMENTARY FIGURES**

2 **Table S1. Patients' treatment information.** HMA: hypomethylating agents. CT:  
3 chemotherapy. Immuno: immunomodulators.

4 **Table S2. Small molecules information.**

5 **Table S3. Antibodies information.**

6 **Figure S1. DRs' surface expression pattern on MDS cells.** DRD1 (A), DRD2 (B), DRD4 (C),  
7 and DRD5 (D) surface expression measured by flow cytometry in blood samples from healthy  
8 donors (HD), MDS samples and AML samples. Results are graphed as a box plot, the statistical  
9 median is indicated as a horizontal line, error bars correspond to SEM. HD n=4-6; MDS n=71-  
10 90; AML n=14. \*\* p<0.01; \*\*\* p<0.001; \*\*\*\* p<0.0001.

11 **Figure S2. Symbol legend of MDS samples used in the experiments.** Each symbol type  
12 corresponds to an MDS patient sample. Healthy donors (HD), grey; RS-MLD, light purple; RS-  
13 SLD, dark purple; 5q-, red; MLD, orange; EB-1, light blue; EB-2, dark blue.

14 **Figure S3. Expression of DRs and HTRs in CD45<sup>low</sup> and CD34<sup>+</sup> MDS cell subpopulations.**  
15 (A) HTR1A, HTR1B, DRD3 and DRD5 surface expression in CD45<sup>low</sup> and CD34<sup>+</sup>  
16 subpopulations in MDS samples (n=23). (B) HTR1A and HTR1B surface expression within the  
17 CD34<sup>+</sup> cell population in healthy donor (HD) and MDS samples (MDS). Horizontal lines  
18 represent grand means. HD n= 3; MDS n= 19. \*\*\* p<0.001.

19 **Figure S4. DR's and HTR's antagonists induce cell death and differentiation on MDS**  
20 **cells.** MDS patient samples were treated with 10  $\mu$ M apomorphine (apo) and 10  $\mu$ M SB224289  
21 (SB9) 72 h. (A) Frequency of CD11b-positive cells measured by flow in vehicle control-,  
22 apomorphine- and SB9-treated MDS samples. N=2 in triplicates. (B) Representative flow plot  
23 of CD11b surface staining. MDS patient samples were treated with 50  $\mu$ M thioridazine (thio).  
24 (C) Cell viability was measured by 7-AAD exclusion by flow cytometry, (D) differentiation  
25 status as determined by CD11b expression by flow cytometry, and (E) a representative flow plot

26 of each condition is presented. Each symbol type corresponds to a patient sample, and each  
27 symbol corresponds to an experimental point. \*  $p < 0.1$ , \*\*  $p < 0.001$ ; \*\*\*\*  $p < 0.0001$ .

28 **Figure S5. MDS-L do not express DRs or HTR1s.** HTR1A (A), HTR1B (B), DRD3 (C) and  
29 DRD5 (D) surface expression levels in MDS-L (solid line) compared to unstained negative  
30 control (tinted line) measured by flow cytometry. A representative histogram is shown.

31 **Figure S6. HTR and DR antagonists synergize with azacytidine and decitabine.** Synergistic  
32 effect of the co-treatment with (apomorphine (apo) and methiothepin (methio) with (A)(C)  
33 azacytidine (aza) or (B)(D) decitabine (deci) as measured by (A)(B) EOBA and (C)(D) CI in  
34 HL-60 AML cells.

| Sample code | HMA/CT/Immuno | Other treatment |
|-------------|---------------|-----------------|
| MDS #1      | No            | No              |
| MDS #5      | No            | No              |
| MDS #6      | No            | No              |
| MDS #9      | No            | No              |
| MDS #10     | Yes           | No              |
| MDS #12     | No            | No              |
| MDS #14     | No            | No              |
| MDS #15     | No            | No              |
| MDS #16     | No            | No              |
| MDS #17     | No            | No              |
| MDS #20     | No            | No              |
| MDS #23     | No            | No              |
| MDS #24     | Yes           | No              |
| MDS #26     | No            | No              |
| MDS #27     | No            | No              |
| MDS #28     | No            | No              |
| MDS #29     | No            | No              |
| MDS #30     | No            | No              |
| MDS #31     | Yes           | No              |
| MDS #32     | No            | No              |
| MDS #33     | Yes           | No              |
| MDS #34     | Yes           | No              |
| MDS #35     | No            | No              |
| MDS #36     | No            | No              |
| MDS #37     | No            | No              |
| MDS #38     | No            | No              |
| MDS #39     | No            | No              |
| MDS #40     | Yes           | No              |
| MDS #41     | No            | No              |
| MDS #43     | No            | Yes             |
| MDS #49     | Yes           | No              |
| MDS #50     | Yes           | No              |
| MDS #52     | Yes           | No              |
| MDS #53     | No            | Yes             |
| MDS #57     | No            | No              |
| MDS #60     | Yes           | No              |
| MDS #68     | No            | No              |
| MDS#73      | No            | No              |
| MDS #74     | No            | No              |
| MDS #76     | Yes           | No              |

|          |     |     |
|----------|-----|-----|
| MDS #78  | No  | Yes |
| MDS#80   | Yes | No  |
| MDS #93  | No  | No  |
| MDS#95   | Yes | Yes |
| MDS #98  | Yes | No  |
| MDS#103  | N/A | N/A |
| MDS#110  | N/A | N/A |
| MDS#113  | N/A | Yes |
| MDS #119 | Yes | No  |
| MDS#122  | No  | Yes |
| MDS #131 | No  | No  |
| MDS #132 | No  | No  |
| MDS #134 | No  | No  |
| MDS #138 | Yes | No  |
| MDS #140 | No  | No  |
| MDS #143 | No  | Yes |
| MDS #145 | Yes | No  |
| MDS #149 | Yes | No  |
| MDS #151 | Yes | No  |
| MDS #154 | No  | No  |
| MDS#161  | N/A | No  |
| MDS #162 | Yes | No  |
| MDS #166 | Yes | No  |
| MDS #170 | Yes | No  |
| MDS #176 | No  | Yes |
| MDS #181 | No  | Yes |
| MDS #186 | No  | No  |
| MDS #187 | No  | Yes |
| MDS #188 | No  | No  |
| MDS #195 | Yes | No  |
| MDS#197  | No  | No  |
| MDS #210 | No  | No  |
| MDS #211 | No  | No  |
| MDS #212 | No  | No  |
| MDS #213 | No  | No  |
| MDS #214 | No  | No  |

| <b>Name</b>                     | <b>Abbreviations</b> | <b>Comercialized by</b>     | <b>Target</b>          | <b>Reference</b> |
|---------------------------------|----------------------|-----------------------------|------------------------|------------------|
| Apomorphine                     | Apo                  | Sigma-aldrich               | HTR1/2 antagonist      | Millan, 2002     |
| Methiothepin mesylate           | Methio               | Santa-Cruz<br>Biotechnology | HTR1/2 antagonist      | Monachon, 1972   |
| NAN-190 hydrobromide            | NAN190               | Sigma-aldrich               | HTR1A antagonist       | Glennon, 1988    |
| SB224289                        | SB9                  | Biogen                      | HTR1B antagonist       | Selkirk, 1998    |
| SCH-23390                       | SC90                 | Biogen                      | D1/D5 antagonist       | Millan, 2001     |
| UH-232                          | UH232                | Biogen                      | D2 antagonist          | Svensson, 1986   |
| Thioridazine                    | Thio                 | Sigma-aldrich               | PanDR antagonist       | Sunahara, 1991   |
| Chlorpromazine<br>hydrochloride | CPZ                  | Sigma-aldrich               | PanDR antagonist       | Freedman, 1994   |
| Decitabine                      | Deci                 | Sigma-aldrich               | Hypomethylating agents | Jones, 1980      |
| Azacitidine                     | Aza                  | Sigma-aldrich               | Hypomethylating agents | Sorm, 1964       |

| <b>Antibody</b>     | <b>Reference</b> | <b>Comercialized by</b> | <b>Conjugated fluorochrome</b> |
|---------------------|------------------|-------------------------|--------------------------------|
| Anti-5HT1A receptor | AB 85615         | ABCAM                   | -                              |
| Anti-5HT1B receptor | ABIN738021       | Antibodies-online       | -                              |
| Anti-DRD1 receptor  | 324390           | EMD Millipore           | -                              |
| Anti-DRD2 receptor  | 324393           | EMD Millipore           | -                              |
| Anti-DRD3 receptor  | 324402           | EMD Millipore           |                                |
| Anti-DRD4 receptor  | 324405           | EMD Millipore           | -                              |
| Anti-DRD5 receptor  | 324408           | EMD Millipore           | -                              |
| CD11b/Mac-1         | ICRF44           | BD                      | PE                             |
| CD45                | HI30             | BD                      | FITC, PE, APC, V450            |

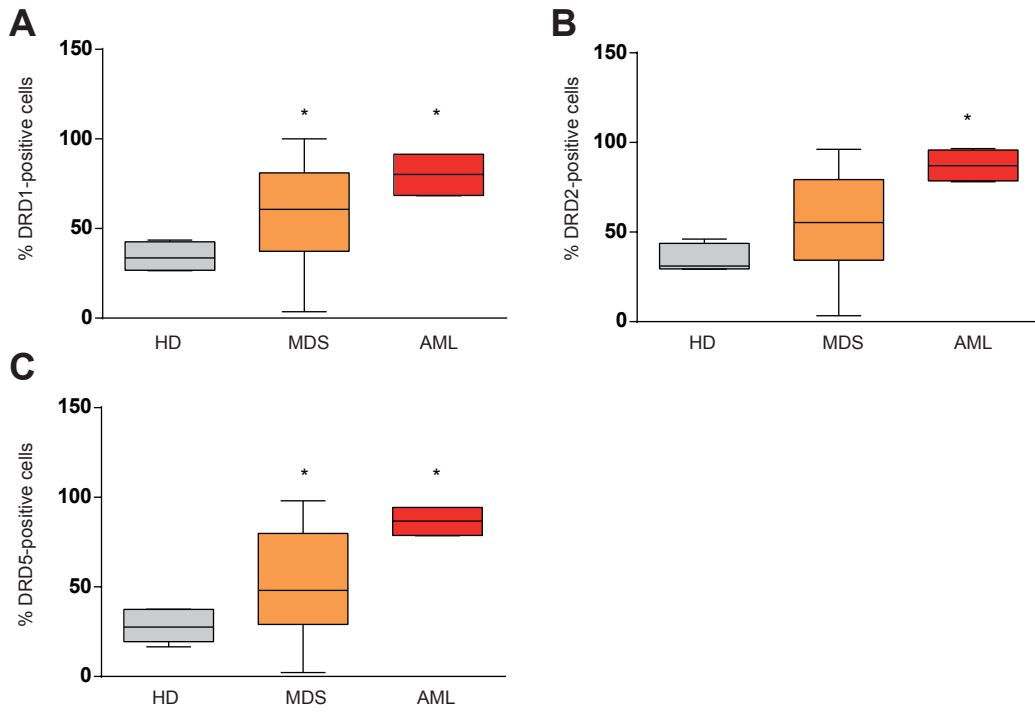



|        |             |             |          |           |            |            |
|--------|-------------|-------------|----------|-----------|------------|------------|
| ● HD 1 | ● RSMLD 6   | ● RSSLD 35  | ● 5Q 12  | ● MLD 15  | ■ EB-1 5   | ▼ EB-2 10  |
| ■ HD 2 | ■ RSMLD 9   | ● RSSLD 143 | ▲ 5Q 23  | ■ MLD 26  | ▼ EB-1 32  | ● EB-2 33  |
| ▲ HD 3 | ▲ RSMLD 28  |             | ■ 5Q 24  | ▲ MLD 29  | ◆ EB-1 38  | ◆ EB-2 40  |
| ▼ HD 4 | ▼ RSMLD 30  |             | ■ 5Q 27  | ● MLD 34  | ● EB-1 49  | ● EB-2 109 |
| ◆ HD 5 | ◆ RSMLD 37  |             | ▼ 5Q 31  | ■ MLD 43  | ● EB-1 57  | ■ EB-2 162 |
| ● HD 6 | ■ RSMLD 140 |             | ▲ 5Q 60  | ▲ MLD 50  | ▲ EB-1 119 | ● EB-2 151 |
|        | ■ RSMLD 176 |             | ▼ 5Q 68  | ▼ MLD 53  | ▲ EB-1 138 | ▲ EB-2 170 |
|        | ● RSMLD 213 |             | ◆ 5Q 98  | ■ MLD 62  | ● EB-1 145 |            |
|        |             |             | ● 5Q 149 | ◆ MLD 66  | ▼ EB-1 154 |            |
|        |             |             | ● 5Q 210 | ● MLD 76  | ■ EB-1 213 |            |
|        |             |             |          | ◆ MLD 74  |            |            |
|        |             |             |          | ▼ MLD 78  |            |            |
|        |             |             |          | ● MLD 108 |            |            |
|        |             |             |          | ● MLD 131 |            |            |
|        |             |             |          | ● MLD 132 |            |            |
|        |             |             |          | ● MLD 134 |            |            |
|        |             |             |          | ● MLD 159 |            |            |
|        |             |             |          | ■ MLD 166 |            |            |
|        |             |             |          | ● MLD 173 |            |            |
|        |             |             |          | ◆ MLD 181 |            |            |
|        |             |             |          | ▲ MLD 186 |            |            |
|        |             |             |          | ▼ MLD 187 |            |            |
|        |             |             |          | ◆ MLD 188 |            |            |
|        |             |             |          | ● MLD 195 |            |            |
|        |             |             |          | ■ MLD 211 |            |            |
|        |             |             |          | ◆ MLD 214 |            |            |

**A**

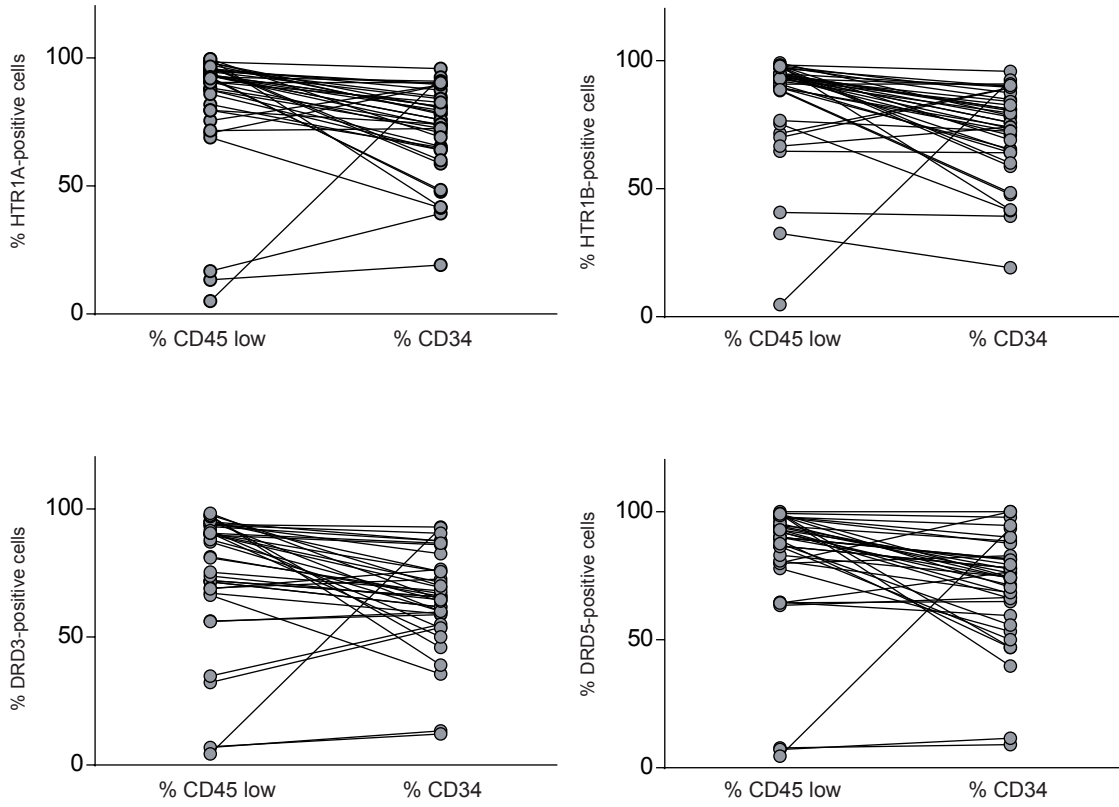

**B**

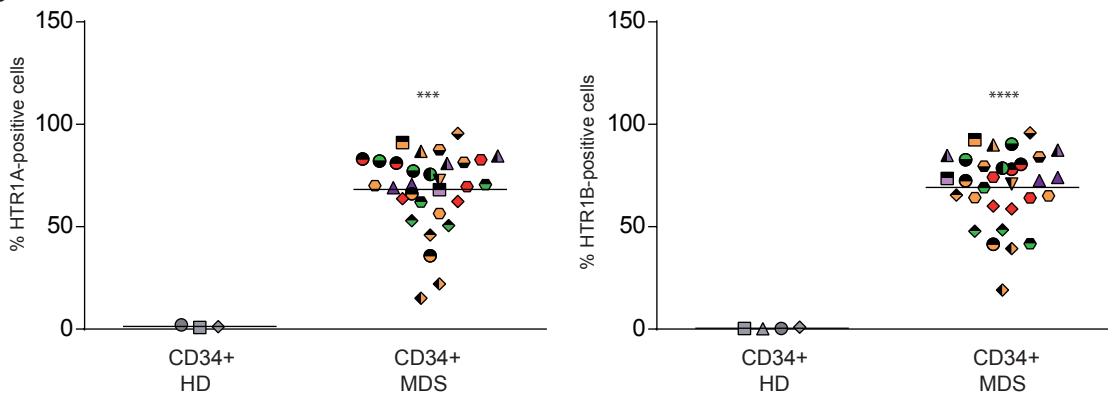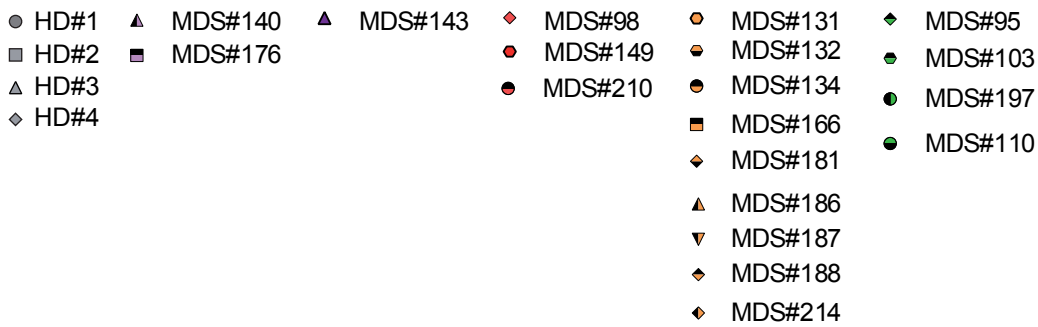

**A**

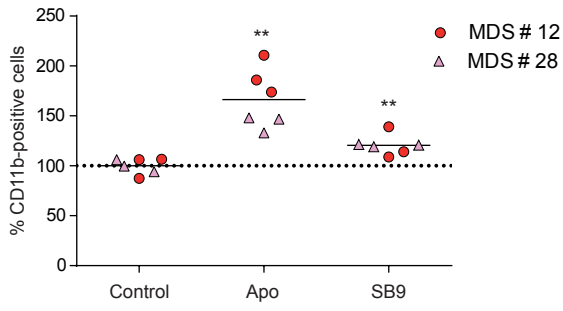

**B**

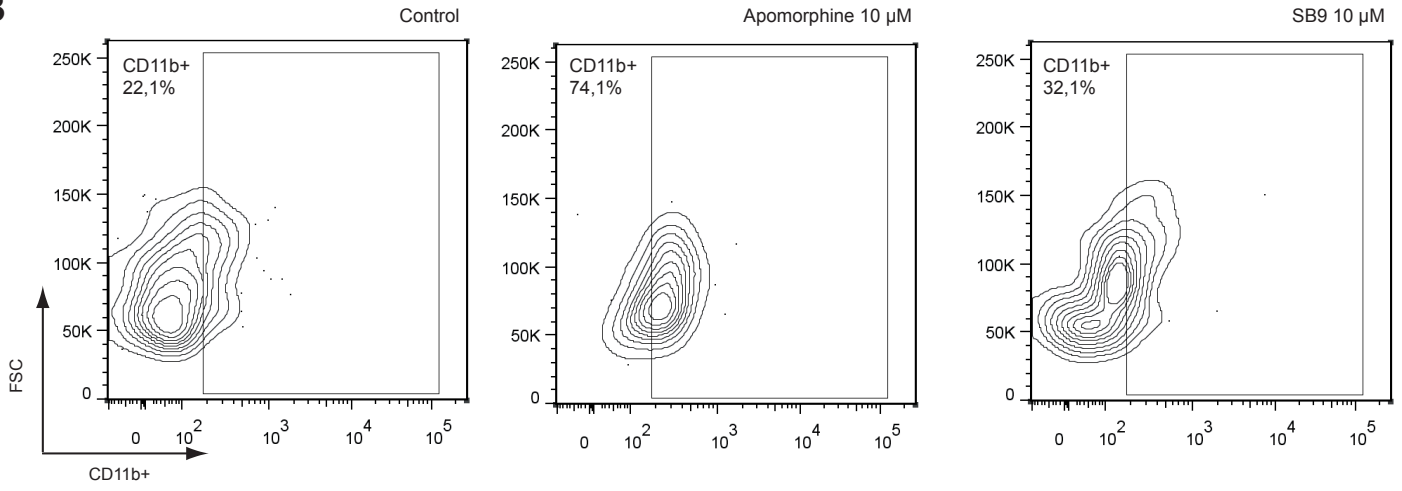

**C**

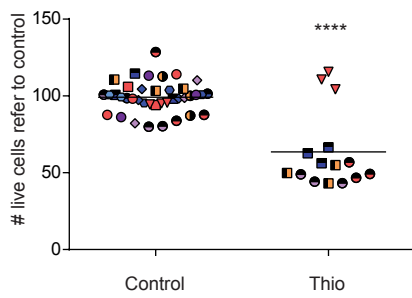

**D**

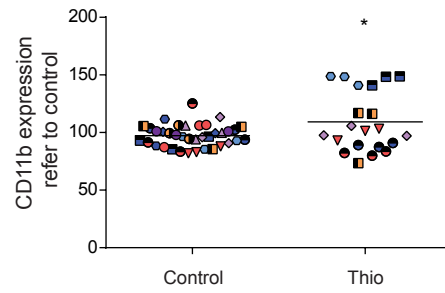

**E**

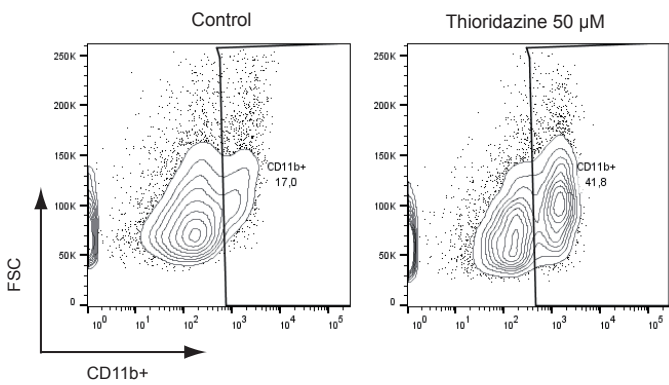

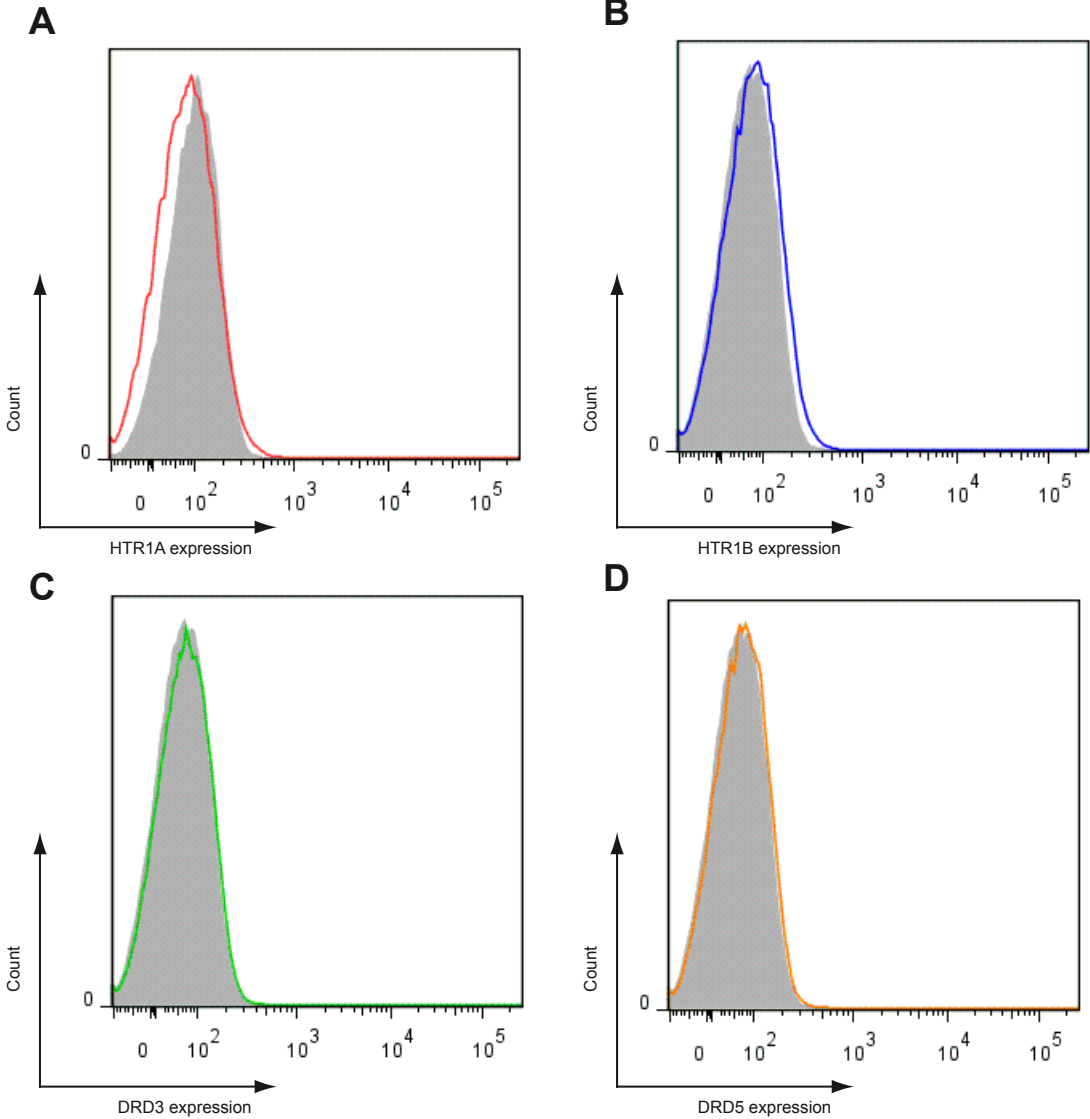

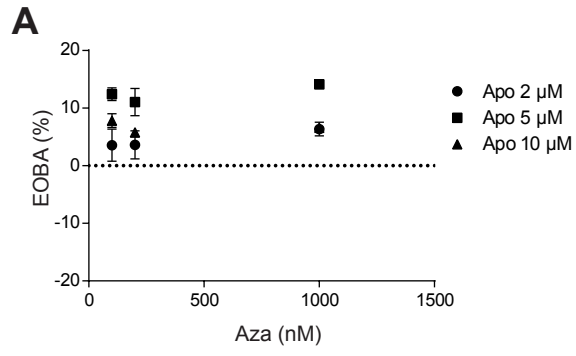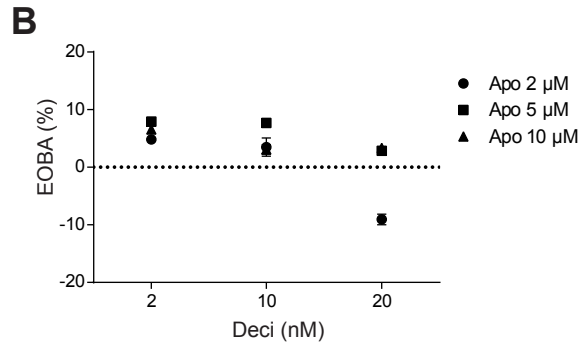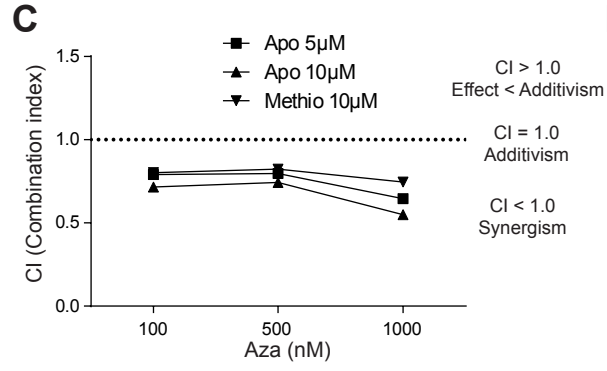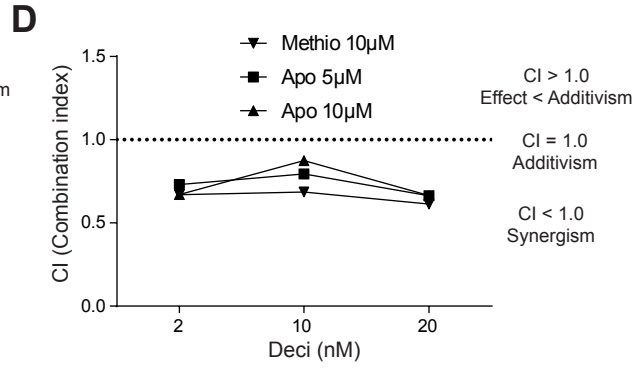

Supplement: 41598_2018_32306_MOESM1_ESM.pdf [file 41598_2018_32306_MOESM1_ESM.pdf]
